# Supplementary material
Source: PubMed Central journal article supplement (PMC3675985)
Supplement: EC.00050-13_zek999094115so1.pdf [file EC.00050-13_zek999094115so1.pdf]

Supplementary information for

**Characterization of *Tt*ALV2, an essential charged repeat motif protein of the  
*Tetrahymena thermophila* membrane skeleton**

by

Houda El-Haddad<sup>1</sup>, Jude M. Pryzborski<sup>2</sup>, Lesleigh G. K. Kraft<sup>4</sup>,  
Geoffrey I. McFadden<sup>3</sup>, Ross F. Waller<sup>3</sup>, Sven B. Gould<sup>1#</sup>

<sup>1</sup>Molecular Evolution, Heinrich-Heine University Düsseldorf, Germany

<sup>2</sup>Parasitology, Phillips-University Marburg, Germany

<sup>3</sup>School of Botany, University of Melbourne, Australia

<sup>4</sup>CEMAR, University of New Brunswick, Canada

**Contents**

|          |                                                      |   |
|----------|------------------------------------------------------|---|
| Fig. S1  | Examples of charged repeat motifs                    | 2 |
| Fig. S2  | Additional immunolocalization                        | 3 |
| Fig. S3  | Localization of <i>Tg</i> ALV1 and fragments thereof | 4 |
| Table S1 | List of common cytoskeletal CRMPs                    | 6 |
| Table S2 | List of primers used in this study                   | 9 |

Spectrin *Homo sapiens* (EAX00140.1; 2,364 aa)

RKFANSLVG...VQQQL.QAFNTYRTVEK.PPKFTEKGNL  
EQLARRFDRkaamRETWL.SENQRLVSQDNFGFDLPVEAA  
QKIFQEMLY...IMDWM.DEMKVLVLSQDYGKHLGVEDL  
WKFFWEMAE...EEGWI.REKEKILSSDDYGKDLTSVMRL  
HQFQADADD...IDAWM.LDILKIVSSSDVGHDEYSTQSL  
YKMFSEADA...CELWI.DEKEQWLNMQIPEKLEDLEVI  
QNYHLECNE...TKSWIRKTKVIESTQDLGNLAGVMAL  
QQFLRDLDLDD...FQSWL.SRTQTATAISEMPNTLTEAEKL  
QQFLRDTKQ...AEAFL.NNQEYVLAHTEMPPTLEGAEAA  
QKFLQDCQE...LSLWI.N.EKMLTAQDM..SYDEARNL  
ELFTQSCAD...LDKWL.HGLESQIQSDDYGKDLTSVNIL  
HQFNRDVED...EILWV.GERMPLATSTDHGHNLTQTVQLL  
QQYYFDAAE...AEAWM.SEQELYMMSEEKAKDEQSAVSM  
FQLNREVDD...LEQWI.AEREVVAGSHELQDYEHVTML  
HKFYHDAKE...IFGRI.QDKHKKL.PEELGRDQNTVETL  
FRFFSMVRD...LMLWM.EDVIRQIEAQEKPRDVSSVELL  
HQFSRDASV...AEAWL.LGQEPYLSREIGOSVDEVEKL

Kinesin light chain *Homo sapiens* (BAB14039.1; 622 aa)

EIPARLRTLHNLVIQyasQGRYEVAVPLCKQALE.DLEKTS  
DHPDVATMLNILALVyrDQNKYKEAAHLLNDALA.IREKTLGK  
DHPAVAATLNNLAVLygkRGKYKEAEPCKRALE.IREKVLGK  
FHPDVAKQLSNLALLcqnQGKAEEVEYYRRALE.IYATRLGP  
DDPNVAKTKNNLASCylkQGKYQDAETLYKEILTrAHEKEFGS  
DSPTVNTTLRSGLALyrrQGKL.EAAHTLEDC.A.SRNRKQGL

ICAMP1 *Toxoplasma gondii* (EEA99429.1; 1,251 aa)

ERKLQELS.....ESLNAAQKARDRSAQ.ElnAMR  
.SKYNILR.....GELEKAEQRNHAEQ.E..AIR  
EKEVSELR.....EAKNKIKASLDLAYQKE..QFR  
GTDLKVAVQ.....QQLDTVTRQKEQLQT.D..AER  
KR.TSELQvqvvedvkaEATQHTE.GLEKRYQ.E..QLR

Myosin heavy chain *Gallus gallus* (AAA48972.1; 1,940 AA)

.KELQAR...IE....ELEEEIEAER.TSRAK.A.EK  
RADLSRE...LE....EISERLEEAG.GATAAQI.DM  
KARLQTE...SG....EYSRQVEEKD.ALISQ.L.SR  
KKKLAQR...LQ....DAEEHVEAVN.SKAS.L.EK  
KQRLQNE...VE....DLMIDVERSN.AACAA.L.DK  
NKNLQOE...IS....DLTEQIAEGG.KAIHE.L.EK  
KKQIEQkseLQ....TA...LEEAE....AS.L.EH  
KKNLQQT...VK....DLQHRLDEAE.Q..LA.L.KG  
GKKQIQK...LEarvrELEGEVDAEQ.KRSAE.A.VK  
RK.YERR...VK....ELTYQSEEDR.KNVLR.LqDL  
VDKLVmk...VK....SYKRQAEAEELSNVN.L.SK

Tetrin D *Tetrahymena thermophila* (EAS03720.1; 741 aa)

E...QLRKLRL...NIVEDREKEI..AKLSSQISQA  
SlndEINRLmadvDNWKIKYTYLD.NQ.RAQENQE  
...EINLK...QLLLAKNQEIDSNRAQHAEIRD  
E...DIQRLK...DTIEIKEKEVQ.NHLKHRELQD  
T...EINDLK...HLVNLKQDEVH.DMINKYEKLE

**Fig. S1.: Examples of charged repeat motifs (CRMs) from different cytoskeletal proteins of eukaryotes.** Shown are only the sections of the protein sequences that contain the charged repeat motif as predicted by RADAR at [www.ebi.ac.uk/Tools/pfa/radar/](http://www.ebi.ac.uk/Tools/pfa/radar/). In parentheses the according accession numbers and the total length of the proteins in amino acid (aa).

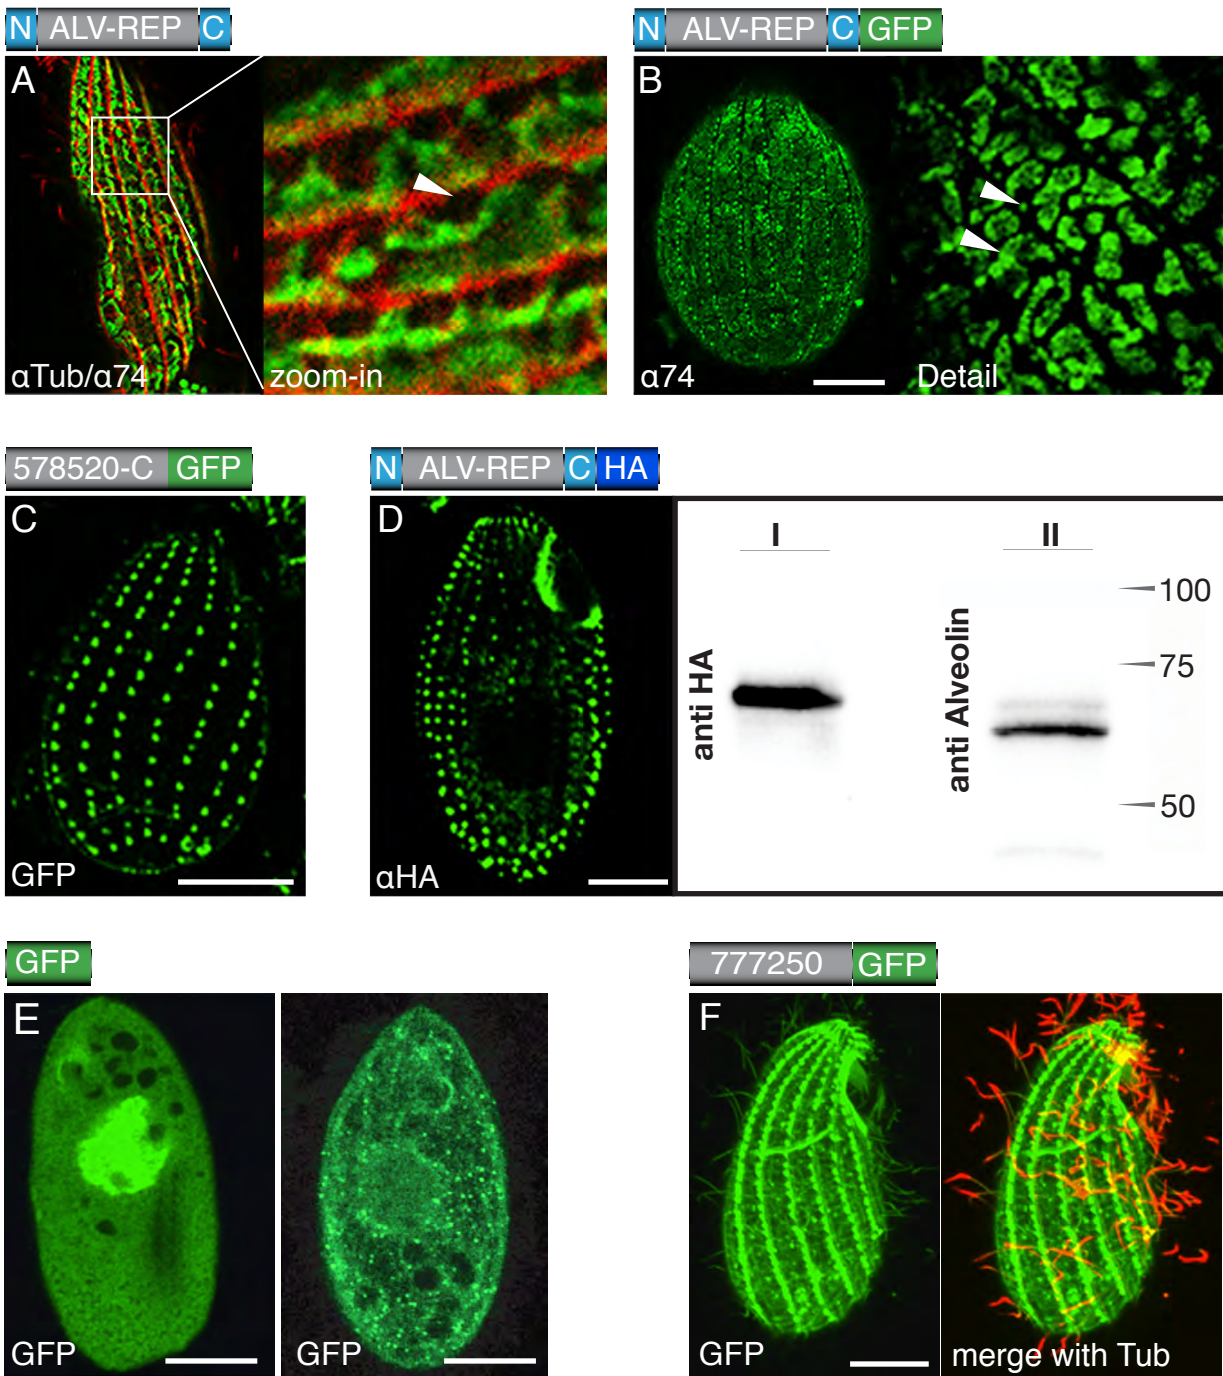

**Fig. S2.: Additional immunolocalization.** **A)** *TtALV2* is excluded from the circumciliary zone (highlighted by arrow head in the zoom-in; tubulin in red). **B)** Cells expressing *TtALV2::GFP* were fixed and labeled with  $\alpha$ -alveolin, which marks both, the patches between the longitudinal microtubules and the basal body association (arrow heads). A close-up of the pattern from another cell is shown on the right. **C)** Localization of the C-terminal (CRM-containing) domain of THERM\_00578520. **D)** Localization of *TtALV2* tagged C-terminally with an hemagglutinin-tag. Corresponding Western blots on the right demonstrates the correct, full-length expression of the construct. **E)** Localization of the green fluorescent protein (GFP) reporter expressed alone (single median optical slice on the left; stacked images including cortical optical slices on the right). **F)** Co-localization of THERM\_77250 and alpha-tubulin. Scale: 10  $\mu$ m.

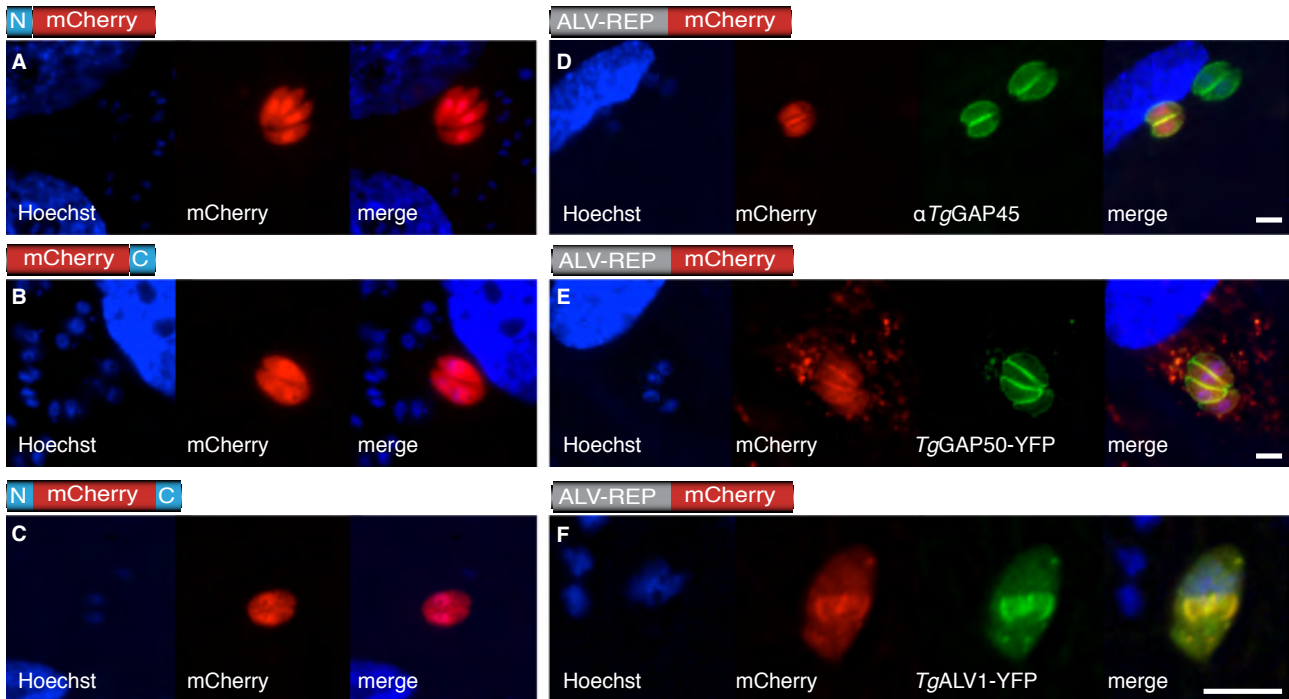

**Fig. S3: The repeats, but not the termini of *Toxoplasma gondii* alveolin1 associate with the alveoli.** Neither the termini of *TgALV1* alone (A and B), nor both in combination (C) are able to target the marker protein to the alveolar sacs. In contrast, the repeat motifs of *TgALV1* alone are sufficient for the association with alveolar membranes as shown in D to F, also in newly forming daughter cells as seen in F, and as indicated by the co-localization with established alveolar markers (anti-TgGAP45, TgGAP50-YFP and TgALV1-YFP). Scale 5  $\mu$ m.

For *Toxoplasma gondii* experiments we generated a new vector, pN-Cherry-C based on the existing TUB8mycGFPMyoATy-HX *Toxoplasma* transfection vector (21) to simplify cloning. mCherry was amplified from plasmid PFA660-mCherry (22) using primers mCherry\_E\_X\_A\_F 5' and mCherry\_N\_TAA\_P\_R. The resulting PCR product was restricted with *EcoRI/PacI* and inserted into similarly restricted TUB8mycGFPMyoATy-HX. This generated a vector containing the mCherry coding sequence, flanked by a 5' and 3' multiple cloning site.

A full-length cDNA copy of the *TgALV1* coding sequence (TGME49\_231640) was amplified from *T. gondii* (RH strain) total RNA using the Invitrogen Superscript III kit and primers Alv\_N\_F 5' and Alv\_C\_R. The resulting PCR product was then used for all subsequent amplification steps. A region coding for the N-terminal region of *TgALV1* was amplified using Alv\_N\_EcoRI\_F and Alv\_N\_AvrII\_R, restricted with *EcoRI/AvrII* and cloned into similarly restricted pN-Cherry-C. A region coding for C-terminal region of *TgALV1* was amplified using Alv\_C\_NsiI\_F and Alv\_C\_PacI\_R, restricted with *NsiI/PacI* and inserted into similarly restricted pN-Cherry-C. Additionally, a region coding for the C-terminal region, amplified as detailed above, was cloned into the construct already containing the N-terminal region via *NsiI/PacI*. Finally, a sequence coding for the repeat region of *TgALV1* was amplified using Alv\_Rep\_EcoRI\_F and Alv\_Rep\_AvrII\_R, and

inserted into pN-Cherry-C via *EcoRI*/*AvrII*. All constructs were verified by restriction digest and automated DNA sequencing. TgGAP50-YFP was a gift of M. Meissner, TgALV1-YFP from B. Striepen. *T. gondii* tachyzoites (RH strain) were transiently transfected by electroporation (23).

All parasites were viewed post-fixation (1% paraformaldehyde/PBS) 24-48 hours post-transfection on a Zeiss Cell Observer microscope system using suitable filters. Immuno-staining was carried out using anti-TgGAP45 (a gift of D. Soldati-Favre, 1:5000 dilution in 3% BSA/PBS) for 1 hour at room temperature followed by suitable secondary antibodies (Dianova 1:2000 in 3%BSA/PBS, 30 minutes at room temperature). Fixed parasites were co-stained with Hoechst 33258 (50 ng ml<sup>-1</sup>) to visualize nuclear DNA. Z-stack images were de-convoluted using Axiovision software, exported to ImageJ and overlaid. Data shown are representative of at least 20 independent observations. No gamma adjustments were applied to any images, and all data are presented in accordance with the recommendations of Rossner and Yamada (24).

**Table S1: List of common cytoskeletal proteins.** Screened were proteins for different characteristics (such as coiled-coils or the presence of ‘SMC’ and Viral A-like domains), and for which empirical evidence exists for their cytoskeletal association (relevant publications listed in the far right column/bottom).

| Organism              | Gene                      | GeneBank   | CRMP | Coiled-Coil | SMC | Viral A | Reference   |
|-----------------------|---------------------------|------------|------|-------------|-----|---------|-------------|
| <i>H. sapiens</i>     | Vimentin                  | EAW86215.1 | No   | Dimeric     | Yes | No      | (1)         |
| <i>H. sapiens</i>     | Lamin                     | EAW52996.1 | Yes  | Dimeric     | Yes | No      | (2)         |
| <i>H. sapiens</i>     | Keratin1                  | EAW96642.1 | Yes  | Dimeric     | Yes | Yes     | (3)         |
| <i>T. vaginalis</i>   | p477                      | EAY10879.1 | Yes  | Dimeric     | Yes | Yes     | (4)         |
| <i>T. gondii</i>      | TgICMAP1                  | EEA99429.1 | Yes  | Dimeric     | Yes | Yes     | (5)         |
| <i>H. sapiens</i>     | Spectrin                  | EAX00140.1 | Yes  | Dimeric     | Yes | No      | (6)         |
| <i>H. sapiens</i>     | Kinesin light chain 2     | BAB14039.1 | Yes  | Dimeric     | Yes | No      | (7)         |
| <i>H. sapiens</i>     | Golgin 84                 | EAW81502.1 | No   | Dimeric     | Yes | No      | (8)         |
| <i>T. thermophila</i> | TtALV2                    | EAR92507.1 | Yes  | Dimeric     | No  | No      | this report |
| <i>T. thermophila</i> | Epiplasmin C              | EAR95236.2 | Yes  | Dimeric     | Yes | Yes     | (9)         |
| <i>T. pyriformis</i>  | Tetrin C                  | EAR86044.1 | Yes  | Trimeric    | Yes | Yes     | (10)        |
| <i>T. thermophila</i> | TtDFB1                    | EAR96064.1 | Yes  | Dimeric     | Yes | Yes     | (11)        |
| <i>T. gondii</i>      | TgSPM1                    | EEA98311.1 | No   | No          | No  | No      | (12)        |
| <i>H. sapiens</i>     | Tropomyosin alpha chain 1 | EAW77635.1 | Yes  | Dimeric     | Yes | No      | (13)        |
| <i>H. sapiens</i>     | Tektin-1                  | EAW90284.1 | Yes  | Dimeric     | Yes | No      | (14)        |
| <i>R. norvegicus</i>  | Spinophilin               | AAC05183.1 | Yes  | Dimeric     | Yes | No      | (15)        |
| <i>H. sapiens</i>     | Gelsolin                  | EAW87491.1 | No   | No          | No  | No      | (16)        |
| <i>E. coli</i>        | FtsZ                      | AAC73206.1 | No   | No          | No  | No      | (17)        |
| <i>H. sapiens</i>     | Ankyrin 2                 | EAX06290.1 | Yes  | No          | No  | No      | (18)        |
| <i>H. sapiens</i>     | Ezrin                     | EAW47646.1 | Yes  | Dimeric     | No  | No      | (19)        |
| <i>M. musculus</i>    | KRIT-1                    | EDL14618.1 | Yes  | No          | No  | No      | (20)        |
| <i>H. sapiens</i>     | Desmin                    | EAW70739.1 | No   | Dimeric     | Yes | No      | (21)        |
| <i>G. gallus</i>      | Myosin heavy chain 2      | AAA48972.1 | Yes  | Dimeric     | Yes | No      | (22)        |
| <i>C. reinhardtii</i> | BLD10                     | EDP06416.1 | No   | Dimeric     | Yes | No      | (23)        |
| <i>H. sapiens</i>     | MARCKS                    | EAW48258.1 | No   | No          | No  | No      | (24)        |
| <i>H. sapiens</i>     | Filamin                   | EAW72745.1 | Yes  | No          | No  | No      | (25)        |
| <i>H. sapiens</i>     | TEM4                      | EAW74891.1 | No   | Trimeric    | No  | No      | (26)        |
| <i>H. sapiens</i>     | Supervillin               | EAW86019.1 | Yes  | No          | No  | No      | (27)        |
| <i>T. thermophila</i> | Tetrin D                  | EAS03720.1 | Yes  | Trimeric    | Yes | Yes     | (11)        |
| <i>T. gondii</i>      | TgIMC 3                   | EEB03770.1 | Yes  | No          | No  | No      | (28)        |
| <i>T. gondii</i>      | TgIMC 4                   | EEB00904.1 | Yes  | No          | No  | No      | (29)        |
| <i>T. gondii</i>      | TgIMC 12                  | EEB00076.1 | Yes  | No          | No  | No      | (30)        |
| <i>T. gondii</i>      | TgIMC 13                  | EEB02264.1 | Yes  | No          | No  | No      | (30)        |
| <i>T. gondii</i>      | TgIMC 14                  | EEA98086.1 | Yes  | No          | No  | No      | (30)        |
| <i>P. falciparum</i>  | PfALV1 (PFE1285w)         | CAD51621.1 | Yes  | No          | No  | No      | (31)        |

|                       |                       |            |     |          |     |     |      |
|-----------------------|-----------------------|------------|-----|----------|-----|-----|------|
| <i>P. falciparum</i>  | PfALV2 (PF10_0039)    | AAN35237.1 | No  | No       | No  | No  | (31) |
| <i>P. falciparum</i>  | PfGAP45               | AAN36304.1 | No  | No       | No  | Yes | (32) |
| <i>T. thermophila</i> | Basal body protein 39 | EAS06694.1 | Yes | Trimeric | Yes | No  | (33) |
| <i>G. gallus</i>      | Titin                 | AAF35436.1 | Yes | No       | No  | No  | (34) |

- Blose SH, Meltzer DI.** 1981. Visualization of the 10-NM filament vimentin rings in vascular endothelial cells in situ: close resemblance to vimentin cytoskeletons found in monolayers in vitro. *Exp. Cell Res.* **135**:299-309.
- McKeon FD, Kirschner MW, Caput D.** 1986. Homologies in both primary and secondary structure between nuclear envelope and intermediate filament proteins. *Nature* **319**:463-468.
- Woodcock-Mitchell J, Eichner R, Nelson WG, Sun TT.** 1982. Immunolocalization of keratin polypeptides in human epidermis using monoclonal antibodies. *J. Cell Biol.* **95**:580-588.
- Bricheux G, Coffe G, Brugerolle G.** 2007. Identification of a new protein in the centrosome-like "attractophore" of *Trichomonas vaginalis*. *Mol. Biochem. Parasitol.* **153**:133-140.
- Heaslip AT, Ems-McClung SC, Hu K.** 2008. TgICMAP1 Is a Novel Microtubule Binding Protein in *Toxoplasma gondii*. *PLoS ONE* **4**:e7406-e7406.
- Nicolson GL, Marchesi VT, Singer SJ.** 1971. The localization of spectrin on the inner surface of human red blood cell membranes by ferritin-conjugated antibodies. *J. Cell Bio.* **51**:265-272.
- Kuznetsov SA, Vaisberg EA, Murphy BD, Gelfand VI.** 1989. 45 kDa fragment of the kinesin molecule possesses high ATPase activity and binds to microtubules. *Molek. Biol.* **23**:580-587.
- Bascom RA.** 1999. Identification and characterization of golgin-84, a novel Golgi integral membrane protein with a cytoplasmic coiled-coil domain. *J Biol. Chem.* **274**:2953-2962.
- Williams NE, Honts JE, Dress VM, Nelsen EM, Frankel J.** 1995. Monoclonal antibodies reveal complex structure in the membrane skeleton of *Tetrahymena*. *J. Eukaryot. Microbiol.* **42**:422-427.
- Honts JE, Williams NE.** 1990. Tetrins: polypeptides that form bundled filaments in *Tetrahymena*. *J. Cell Sci.* **96**:293-302.
- Gould SB, Kraft LGK, van Dooren GG, Goodman CD, Ford KL, Cassin AM, Bacic A, McFadden GI, Waller RF.** 2011. Ciliate Pellicular Proteome Identifies Novel Protein Families with Characteristic Repeat Motifs That Are Common to Alveolates. *Mol. Biol. Evol.* **28**:1319-1331.
- Tran JQ, Li C, Chyan A, Chung L, Morrisette NS.** 2012. SPM1 Stabilizes Subpellicular Microtubules in *Toxoplasma gondii*. *Eukaryot. Cell* **11**:206-216.
- Perry SV.** 2001. Vertebrate tropomyosin: distribution, properties and function. *J. Muscle Res. Cell Mot.* **22**:5-49.
- Nojima D, Linck RW, Egelman EH.** 1995. At least one of the protofilaments in flagellar microtubules is not composed of tubulin. *Curr. Biol.* **5**:158-167.
- Satoh A, Nakanishi H, Obaishi H, Wada M, Takahashi K, Satoh K, Hirao K, Nishioka H, Hata Y, Mizoguchi A.** 1998. Neurabin-II/spinophilin. *J. Biol. Chem.* **273**:3470-3475.
- Yin HL, Albrecht JH, Fattoum A.** 1981. Identification of gelsolin, a Ca<sup>2+</sup>-dependent regulatory protein of actin gel-sol transformation, and its intracellular distribution in a variety of cells and tissues. *J. Cell Biol.* **91**:901-906.
- Lutkenhaus J.** 1993. FtsZ ring in bacterial cytokinesis. *Mol. Micro.* **9**:403-409.
- Bennett V, Baines AJ.** 2001. Spectrin and ankyrin-based pathways: metazoan inventions for integrating cells into tissues. *Physiol. Rev.* **81**:1353-1392.
- Bretscher A, Edwards K, Fehon RG.** 2002. ERM proteins and merlin: integrators at the cell cortex. *Nature Rev. Mol. Cell Biol.* **3**:586-599.
- Béraud-Dufour S, Gautier R, Albiges-Rizo C, Chardin P, Faurobert E.** 2007. Krit 1 interactions with microtubules and membranes are regulated by Rap1 and integrin cytoplasmic domain associated protein-1. *FEBS Journal* **274**:5518-5532.
- Lazarides E, Hubbard BD.** 1976. Immunological characterization of the subunit of the 100 Å filaments from muscle cells. *Proc. Natl. Acad. Sci. USA.* **73**:4344-4348.
- Kuczmariski ER, Rosenbaum JL.** 1979. Studies on the organization and localization of actin and myosin in neurons. *J. Cell Biol.* **80**:356-371.
- Hiraki M, Nakazawa Y, Kamiya R, Hirono M.** 2007. Bld10p Constitutes the Cartwheel-Spoke Tip and Stabilizes the 9-Fold Symmetry of the Centriole. *Curr. Biol.* **17**:1778-1783.

24. **Hartwig JH, Thelen M, Resen A, Janmey PA, Nairn AC, Aderem A.** 1992. MARCKS is an actin filament crosslinking protein regulated by protein kinase C and calcium-calmodulin. *Nature* **356**:618-622.
25. **Popowicz GM, Schleicher M, Noegel AA, Holak TA.** 2006. Filamins: promiscuous organizers of the cytoskeleton. *Trends Biochem. Sci.* **31**:411-419
26. **Mitin N, Rossman KL, Der CJ.** 2012. Identification of a Novel Actin-Binding Domain within the Rho Guanine Nucleotide Exchange Factor TEM4. *PLoS ONE* **7**:e41876.
27. **Pestonjamasp KN, Pope RK, Wulfschlegel JD, Luna EJ.** 1997. Supervillin (p205): A novel membrane-associated, F-actin-binding protein in the villin/gelsolin superfamily. *J. Cell Biol.* **139**:1255-1269.
28. **Gubbels M-J, Wieffer M, Striepen B.** 2004. Fluorescent protein tagging in *Toxoplasma gondii*: identification of a novel inner membrane complex component conserved among Apicomplexa. *Mol. Biochem. Parasitol.* **137**:99-110.
29. **Hu K, Johnson J, Florens L, Fraunholz M, Suravajjala S, DiLullo C, Yates J, Roos DS, Murray JM.** 2006. Cytoskeletal Components of an Invasion Machine—The Apical Complex of *Toxoplasma gondii*. *PLoS Pathog* **2**:e13.
30. **Anderson-White BR, Ivey FD, Cheng K, Szatanek T, Lorestani A, Beckers CJ, Ferguson DJP, Sahoo N, Gubbels M-J.** 2011. A family of intermediate filament-like proteins is sequentially assembled into the cytoskeleton of *Toxoplasma gondii*. *Cell Micro.* **13**:18-31.
31. **Kono M, Herrmann S, Loughran NB, Cabrera A, Engelberg K, Lehmann C, Sinha D, Prinz B, Ruch U, Heussler V, Spielmann T, Parkinson J, Gilberger TW.** 2012. Evolution and Architecture of the Inner Membrane Complex in Asexual and Sexual Stages of the Malaria Parasite. *Mol. Biol. Evol.* **29**:2113-2132.
32. **Gaskins E.** 2004. Identification of the membrane receptor of a class XIV myosin in *Toxoplasma gondii*. *J. Cell Biol.* **165**:383-393.
33. **Kilburn CL, Pearson CG, Romijn EP, Meehl JB, Giddings TH, Culver BP, Yates JR, Winey M.** 2007. New *Tetrahymena* basal body protein components identify basal body domain structure. *J. Cell Biol.* **178**:905-912.
34. **Wang K, McClure J, Tu A.** 1979. Titin: major myofibrillar components of striated muscle. *Proc. Natl. Acad. Sci. USA.* **76**:3698-3702.



**Table S2: List of primers used in this study.**

| <b><i>Tetrahymena thermophila</i></b> |                                                  |
|---------------------------------------|--------------------------------------------------|
| Alv2GFP_HindIII_F                     | 5'-ATGAAGCTTTAATCAAGCAATTTTGG-3'                 |
| Alv2GFP_XhoI_R                        | 5'-AACTCGAGAACATACTATTTAATGTATG-3'               |
| Alv2_REP_HindIII_F                    | 5'-CAGACACAGCAAAGCTTCTTGGATC-3'                  |
| Alv2_REP_XhoI_R                       | 5'-GAACTCGAGTTTTTCAATAACTCTTTC-3'                |
| N_GFP_C1_SphI_F                       | 5'-TAATAAGAAGCATGCGTATATAATC-3'                  |
| N_GFP_C1_MluI_R                       | 5'-GCTGTGTCTGTTTGACGCGTTTCTTGC-3'                |
| N_GFP_C2_NsiI_F                       | 5'-GCGTATGCATAGAGTTATTGAAAAACC-3'                |
| N_GFP_C2_BamHI_R                      | 5'-CAAATAAAGGATCCTCAAACATAC-3'                   |
| KO1f                                  | 5'-AAATTGAAGAAGGGCCCATCAAAG-3'                   |
| KO1r                                  | 5'-CTTTATATTTAAAATGTCGACTTTTAC-3'                |
| KO2f                                  | 5'-CTCACCTGCAGCTAATTATTAGAG-3'                   |
| KO2r                                  | 5'-CATTTTCGTTCCGCGGAACATTTGTTTATC-3'             |
| tKD1f                                 | 5'-CCTGAAAGATTACTGCAGTATAC-3'                    |
| tKD1r                                 | 5'-GGAAGCCGGTCTTGTGCGATCAAGATG-3'                |
| tKD2f                                 | 5'-GATGAATGAGCTATGTTTTGAGCAGC-3'                 |
| tKD2r                                 | 5'-GAATGGTGAACAGATAGATAAATG-3'                   |
| Alv2_qPCR_FOR                         | 5'-TTCCAAATGCGCAGACTATT-3'                       |
| Alv2_qPCR_REV                         | 5'-TGAAGTGCTCACTCCTCCTTT-3'                      |
| 777250_SphI_F                         | 5'-AGTCAAGCATGCATGCAACACCAAGATC-3'               |
| 777250_MluI_R                         | 5'-ATTTTATATATTTACGCGTATAATTGCTT-3'              |
| 578520-4_SphI_F                       | 5'-ATTAGCATGCATGTAATTAGAAGGTG-3'                 |
| 578520-4_MluI_R                       | 5'-GATACGCGTTTCTTCAGTTTCAAG-3'                   |
| <b><i>Toxoplasma gondii</i></b>       |                                                  |
| mCherry_E_X_A_F                       | 5'-CCGAATTCCTCGAGCCTAGGATGGTGAGCAAGGGCGAGGAGG-3' |
| mCherry_N_TAA_P_R                     | 5'-GCTTAATTAAGGCTTAATGCATCTTGTACAGCTCGTCCATG-3'  |
| Alv_N_F                               | 5'-ATGTTTAAGGACTGCGCC G-3'                       |
| Alv_C_R                               | 5'-TTAATTAGCACTGGC ATC GGC AC-3'                 |
| Alv_N_EcoRI_F                         | 5'-CCGAATTCATG TTT AAG GAC TGC GCC G-3'          |
| TgAlv_N_AvrII_R                       | 5'-CCC CTA GGG GCA ACC CAT TGT CTC TCA G-3'      |
| Alv_C_NsiI_F                          | 5'-GGATGCATCCTTGCGACGTCGAGATC-3'                 |
| Alv_C_Pacl_R                          | 5'-GCTTAATTAATTAGCACTGGCATCGGCAC-3'              |
| Alv_Rep_EcoRI_F                       | 5'-CAGAGATCTATGACTGCATACCAGCCTATTGAC-3'          |
| Alv_Rep_AvrII_R                       | 5'-GTCCCTAGGAACTGGCTTGATCACGTCTTGCACC-3'         |
